# Supplementary material
Source: HighWire-hosted journal article supplement (https://jnm.snmjournals.org/highwire/filestream/95406/field_highwire_adjunct_files/0/216432_Supplemental_Data.pdf)
Supplement: 216432_Supplemental_Data.pdf [file 216432_Supplemental_Data.pdf]

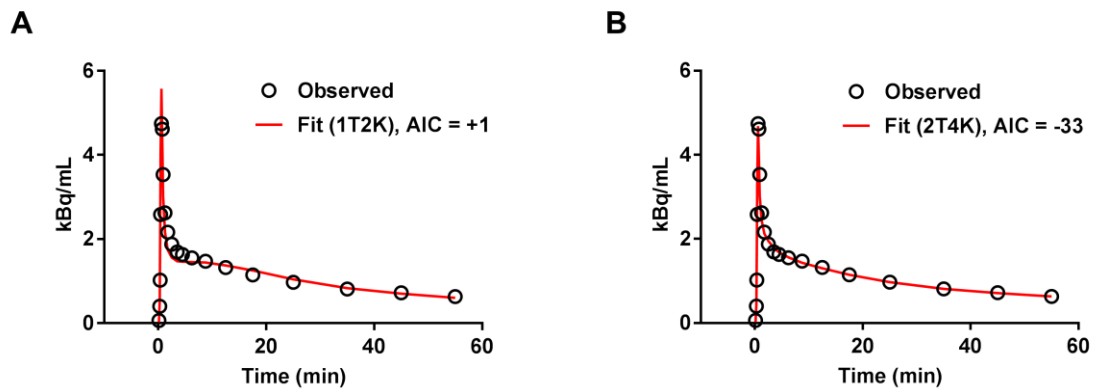

**SUPPLEMENTAL FIGURE 1.** Time-activity curves in whole brain gray matter for baseline scan and fits obtained with a 1-tissue-2-rate constant (1T2K, A) and a 2-tissue-4-rate constant (2T4K, B) compartment model for one representative subject (subject 06) (AIC = Akaike information criterion).

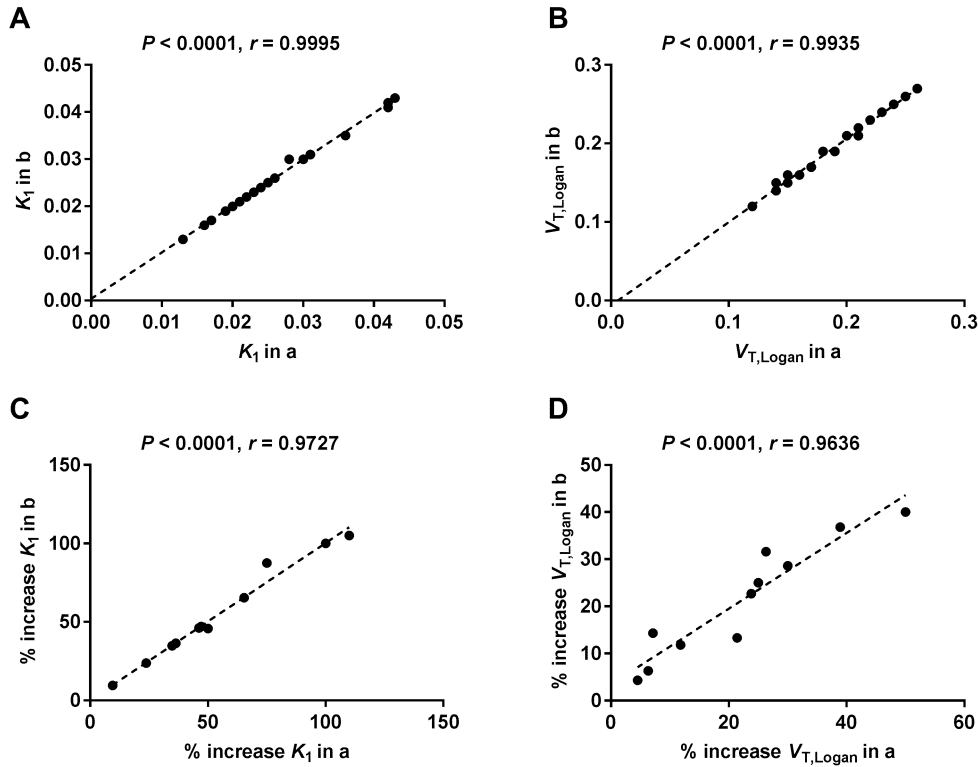

**SUPPLEMENTAL FIGURE 2.** Correlations between outcome parameters ( $K_1$ ,  $V_{T,Logan}$ ) determined with (in b) and without (in a) correction of radioactivity in plasma for polar radiolabeled metabolites of  $^{11}\text{C}$ -erlotinib using the solid-phase extraction protocol (A, B). In C and D, correlations between the percentage increases in  $K_1$  and  $V_{T,Logan}$  after oral intake of unlabeled erlotinib are shown ( $r$  = Spearman correlation coefficient). Shown data are from 11 subjects pertaining to different erlotinib dose groups (300 mg:  $n=4$ , 650 mg:  $n=5$ , 1,000 mg:  $n=2$ ), for whom metabolite data were available for 7 blood sampling time points.

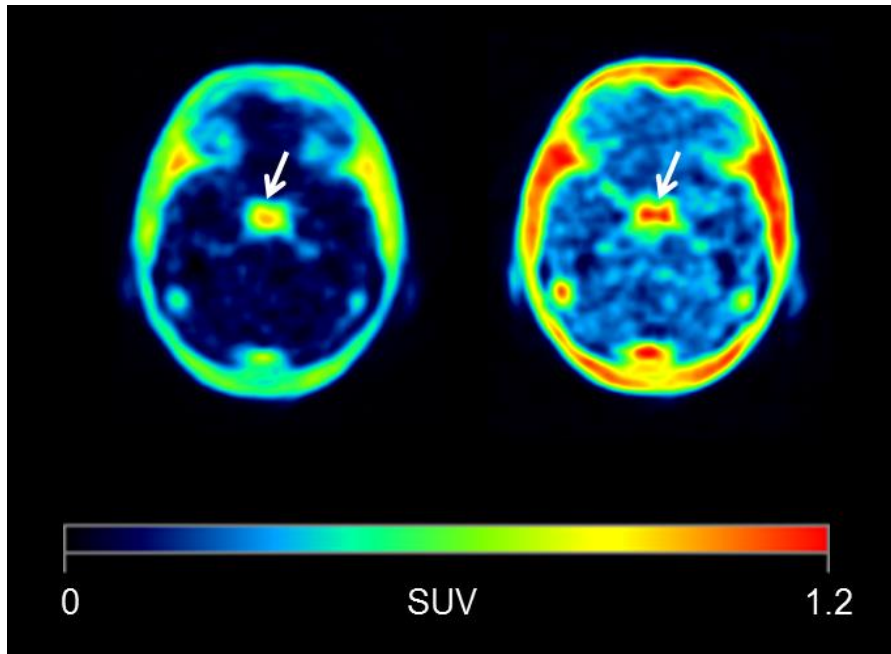

**SUPPLEMENTAL FIGURE 3.** Representative transaxial PET summation images (15-60 min) for baseline scan (left image) and scan after oral intake of 650 mg erlotinib (subject 18). The pituitary gland is highlighted by a white arrow. Radioactivity concentration is normalized to injected radioactivity amount per body weight and expressed as standardized uptake value (SUV) and radiation scale is set from 0 to 1.2.

## SUPPLEMENTAL TABLE 1

### Adverse Events Recorded during the Study

| <b>Subject</b> | <b>Medication</b>   | <b>Adverse event</b>                                            |
|----------------|---------------------|-----------------------------------------------------------------|
| 01             | tariquidar          | hematoma, inflammation                                          |
| 02             | tariquidar          | hematoma                                                        |
| 03             | tariquidar          | metallic taste, inflammation,<br>blueish color of the fingers   |
| 04             | tariquidar          | inflammation, thrombosis upper arm                              |
| 05             | tariquidar          | hypotension, chills, sweating, diarrhea,<br>venous inflammation |
| 06             | erlotinib, 300 mg   | hematoma                                                        |
| 07             | erlotinib, 300 mg   | none                                                            |
| 08             | erlotinib, 300 mg   | none                                                            |
| 09             | erlotinib, 300 mg   | hematoma                                                        |
| 10             | erlotinib, 300 mg   | none                                                            |
| 23             | erlotinib, 300 mg   | hematoma, skin rash                                             |
| 27             | erlotinib, 300 mg   | hematoma                                                        |
| 17             | erlotinib, 650 mg   | none                                                            |
| 18             | erlotinib, 650 mg   | skin rash                                                       |
| 19             | erlotinib, 650 mg   | none                                                            |
| 20             | erlotinib, 650 mg   | hematoma, skin rash                                             |
| 21             | erlotinib, 650 mg   | hematoma, skin rash                                             |
| 22             | erlotinib, 650 mg   | skin rash                                                       |
| 28             | erlotinib, 650 mg   | headache, hematoma, skin rash                                   |
| 29             | erlotinib, 650 mg   | skin rash                                                       |
| 25             | erlotinib, 1,000 mg | hematoma, skin rash                                             |
| 26             | erlotinib, 1,000 mg | hematoma, skin rash                                             |

## SUPPLEMENTAL TABLE 2

Percentage of Unchanged  $^{11}\text{C}$ -Erlotinib in Plasma Determined with Solid-Phase  
Extraction Protocol for Baseline and Different Erlotinib Dose Groups

| Time after injection | Baseline | 300 mg   | 650 mg   | 1,000 mg  |
|----------------------|----------|----------|----------|-----------|
| 3.5 min              | 98.8±0.5 | 99.2±0.2 | 98.9±0.3 | 99.1±0.04 |
| 5 min                | 98.3±0.6 | 99.2±0.1 | 98.7±0.5 | 99.0±0.04 |
| 10 min               | 97.7±1.2 | 98.9±0.2 | 98.3±0.6 | 98.7±0.1  |
| 20 min               | 97.3±1.0 | 98.7±0.1 | 98.2±0.6 | 98.0±0.1  |
| 30 min               | 96.8±1.5 | 98.7±0.1 | 97.8±0.9 | 98.0±0.3  |
| 40 min               | 95.6±2.1 | 98.7±0.2 | 97.3±0.8 | 97.4±0.04 |
| 60 min               | 94.8±2.4 | 98.0±0.5 | 97.1±0.9 | 97.2±0.8  |

### SUPPLEMENTAL TABLE 3

#### Pharmacokinetic Data of Unlabeled Erlotinib in Plasma

| Dose     | $C_{\max}$ ( $\mu\text{mol/L}$ ) | median $T_{\max}$ (h) | $\text{AUC}_{0-21}$ ( $\mu\text{mol/L}\times\text{h}$ ) | $\text{AUC}_{0-\infty}$ ( $\mu\text{mol/L}\times\text{h}$ ) |
|----------|----------------------------------|-----------------------|---------------------------------------------------------|-------------------------------------------------------------|
| 300 mg   | 5.7 $\pm$ 2.2                    | 3                     | 69 $\pm$ 15                                             | 139 $\pm$ 57                                                |
| 650 mg   | 9.1 $\pm$ 2.2                    | 4                     | 122 $\pm$ 33                                            | 292 $\pm$ 117                                               |
| 1,000 mg | 8.4 $\pm$ 1.3                    | 2                     | 130 $\pm$ 5                                             | 372 $\pm$ 2                                                 |

$C_{\max}$ , maximum plasma concentration,  $T_{\max}$ , time of maximum plasma concentration,  $\text{AUC}_{0-21}$ , area under the curve from 0 to 21 h after oral dosing,  $\text{AUC}_{0-\infty}$ , area under the curve from 0 to infinity

**SUPPLEMENTAL TABLE 4**

<sup>11</sup>C-Erlotinib Outcome Parameters for Baseline Scan and Scan during i.v. Infusion of Tariquidar. Subjects are Grouped into their *ABCG2* Genotype

| Group                 | Number of subjects | AUC <sub>brain</sub><br>(SUV×min) | V <sub>T,Logan</sub> | V <sub>T,2T4K</sub> | K <sub>1</sub><br>(mL/(g×min)) | k <sub>2</sub><br>(1/min) | k <sub>3</sub><br>(1/min) | k <sub>4</sub><br>(1/min) |
|-----------------------|--------------------|-----------------------------------|----------------------|---------------------|--------------------------------|---------------------------|---------------------------|---------------------------|
| c.421CC<br>baseline   | 4                  | 9.9±2.1                           | 0.18±0.01<br>(1)     | 0.14±0.02<br>(4)    | 0.024±0.004<br>(11)            | 0.259±0.064<br>(15)       | 0.026±0.011<br>(39)       | 0.052±0.013<br>(32)       |
| c.421CC<br>tariquidar | 4                  | 14.0±3.7                          | 0.20±0.0<br>(1)      | 0.17±0.02<br>(2)    | 0.026±0.005<br>(9)             | 0.241±0.042<br>(14)       | 0.035±0.020<br>(36)       | 0.059±0.023<br>(21)       |
| c.421CA<br>baseline   | 1                  | 12.4                              | 0.21<br>(1)          | 0.18<br>(1)         | 0.023<br>(5)                   | 0.210<br>(8)              | 0.026<br>(14)             | 0.045<br>(8)              |
| c.421CA<br>tariquidar | 1                  | 17.9                              | 0.29<br>(2)          | 0.34<br>(13)        | 0.026<br>(6)                   | 0.186<br>(8)              | 0.019<br>(19)             | 0.013<br>(33)             |

Outcome parameters are given as mean ± standard deviation averaged over all subjects per group (if applicable). The value in parentheses represents the precision of parameter estimates (expressed as their coefficient of variation in percent).

AUC<sub>brain</sub>, area under the brain time-activity curve; K<sub>1</sub>, k<sub>2</sub>, k<sub>3</sub>, k<sub>4</sub>, rate constants for transfer of radioactivity between the plasma, the first and the second tissue compartments calculated with 2-tissue-4-rate constant (2T4K) compartment model; V<sub>T,2T4K</sub>, total volume of distribution calculated with 2T4K model; V<sub>T,Logan</sub>, V<sub>T</sub> calculated with Logan graphical analysis

## SUPPLEMENTAL TABLE 5

Subjects' Genotype, Unbound Erlotinib Plasma Concentrations at the Time of the PET Scan and Whole  
Brain  $V_{T,Logan}$  Values in Scan 1 and Scan 2

| Subject ID | Dose (mg) | Genotype     |           |              |           | $C_{PET}$ ( $\mu$ M)* | $V_T$ scan 1 | $V_T$ scan 2 | Percentage change <sup>†</sup> |
|------------|-----------|--------------|-----------|--------------|-----------|-----------------------|--------------|--------------|--------------------------------|
|            |           | <i>ABCB1</i> |           | <i>ABCG2</i> |           |                       |              |              |                                |
|            |           | rs2032582    | rs1045642 | rs1128503    | rs2231142 |                       |              |              |                                |
| 06         | 300       | [G];[T]      | [C];[T]   | [C];[T]      | [C];[A]   | 0.23<br>(0.22, 0.25)  | 0.22         | 0.23         | +5                             |
| 07         | 300       | [G];[T]      | [C];[T]   | [T];[T]      | [C];[A]   | 0.37<br>(0.38, 0.36)  | 0.14         | 0.21         | +50                            |
| 08         | 300       | [G];[T]      | [C];[T]   | [C];[T]      | [C];[C]   | 0.26<br>(0.28, 0.24)  | 0.12         | 0.15         | +25                            |
| 09         | 300       | [G];[T]      | [C];[T]   | [C];[T]      | [C];[C]   | 0.16<br>(0.17, 0.16)  | 0.16         | 0.17         | +6                             |
| 10         | 300       | [G];[T]      | [C];[T]   | [T];[T]      | [C];[A]   | 0.21<br>(0.22, 0.21)  | 0.16         | 0.16         | +6                             |
| 23         | 300       | [T];[T]      | [T];[T]   | [T];[T]      | [C];[C]   | 0.23<br>(0.22, 0.24)  | 0.18         | 0.21         | +17                            |
| 27         | 300       | [T];[T]      | [C];[T]   | [C];[T]      | [C];[C]   | 0.09<br>(0.09, 0.08)  | 0.18         | 0.16         | -11                            |
| 17         | 650       | [G];[G]      | [C];[C]   | [C];[C]      | [C];[C]   | 0.31<br>(0.35, 0.27)  | 0.14         | 0.15         | +7                             |
| 18         | 650       | [G];[T]      | [C];[T]   | [C];[T]      | [C];[C]   | 0.44<br>(0.44, 0.44)  | 0.14         | 0.18         | +29                            |
| 19         | 650       | [G];[G]      | [C];[T]   | [C];[C]      | [C];[A]   | 0.22<br>(0.23, 0.21)  | 0.19         | 0.24         | +26                            |
| 20         | 650       | [G];[T]      | [T];[T]   | [C];[T]      | [C];[C]   | 0.45<br>(0.44, 0.47)  | 0.14         | 0.17         | +21                            |
| 21         | 650       | [G];[G]      | [C];[C]   | [C];[C]      | [C];[C]   | 0.29<br>(0.32, 0.26)  | 0.17         | 0.19         | +12                            |
| 22         | 650       | [G];[G]      | [C];[T]   | [C];[C]      | [C];[C]   | 0.47<br>(0.45, 0.49)  | 0.18         | 0.25         | +39                            |
| 28         | 650       | [G];[G]      | [C];[C]   | [C];[C]      | [C];[A]   | 0.55<br>(0.40, 0.70)  | 0.18         | 0.20         | +11                            |
| 29         | 650       | [G];[T]      | [C];[T]   | [C];[T]      | [C];[C]   | 0.45<br>(0.35, 0.55)  | 0.12         | 0.17         | +42                            |
| 25         | 1,000     | [G];[G]      | [C];[T]   | [C];[C]      | [C];[C]   | 0.42<br>(0.46, 0.38)  | 0.20         | 0.26         | +30                            |
| 26         | 1,000     | n.d.         | [C];[C]   | [C];[C]      | [C];[C]   | 0.73<br>(0.77, 0.68)  | 0.21         | 0.26         | +24                            |

$C_{PET}$ , unbound erlotinib plasma concentration at time of the PET scan, mean of values measured at 3 h and 4 h after oral dosing (given in parentheses);  $V_T$ , volume of distribution in whole brain gray matter calculated with Logan analysis

\* in 6 out of 17 subjects no individual measurement of plasma protein binding was available, so that mean value of all other subjects was used

<sup>†</sup> percentage change in  $V_T$  in scan 2 relative to scan 1

n.d. not determined
